# Supplementary material for: Population Pharmacokinetics of Brentuximab Vedotin in Patients With CD30‐Expressing Hematologic Malignancies
Source: PubMed Central journal article supplement — J Clin Pharmacol. 2017 May 17;57(9):1148–58. doi: 10.1002/jcph.920 (PMC5574006; doi:10.1002/jcph.920), 2017-05-17
Supplement: JCPH-57-1148-s001.pdf [file JCPH-57-1148-s001.pdf]

# **Population Pharmacokinetics of Brentuximab Vedotin in Patients with CD30-Expressing Hematologic Malignancies**

Authors: Hong Li, Tae H. Han, Naomi N. Hunder, Graham Jang, and Baiteng Zhao

## **Table of Contents**

|                                                                                                                |   |
|----------------------------------------------------------------------------------------------------------------|---|
| Supplementary Table S1. Brentuximab Vedotin Sampling Timepoints for Studies in the Population PK Analysis..... | 2 |
| Supplementary Figure S1. Sequential Population PK Model Development .....                                      | 4 |
| Supplementary Figure S2. Goodness-of-Fit Plots .....                                                           | 5 |
| Supplementary Figure S3. Model External Validation.....                                                        | 6 |
| Supplementary Material S1. NONMEM Code for the ADC and MMAE Population PK Model.....                           | 7 |
| Supplementary Appendix S1. Clinical Study Sites and Institutional Review Boards .....                          | 8 |

**Supplementary Table S1. Brentuximab Vedotin Sampling Timepoints for Studies in the Population PK Analysis**

| Study Description<br>[clinicaltrials.gov no.]              | Brentuximab Vedotin<br>Dose Regimen                                                                                | Patient Population                                                        | No. of<br>Patients <sup>a</sup> | Brentuximab Vedotin<br>PK Sampling Timepoints                                                                                                                                                                                                                                                                                                                                                                                                 |
|------------------------------------------------------------|--------------------------------------------------------------------------------------------------------------------|---------------------------------------------------------------------------|---------------------------------|-----------------------------------------------------------------------------------------------------------------------------------------------------------------------------------------------------------------------------------------------------------------------------------------------------------------------------------------------------------------------------------------------------------------------------------------------|
| Study 1<br>Phase 1 dose-ranging<br>study<br>[NCT00430846]  | 0.1 to 3.6 mg/kg IV Q3Wk<br>(Day 1 of each 21-day<br>cycle): 2-hr infusion                                         | Relapsed/refractory<br>CD30-expressing<br>hematologic<br>malignancies     | 48 <sup>b</sup>                 | <u>Cycle 1:</u> pre-dose, 10 min, 2, 4, 8*, 12*, and 18 h*<br>post EOI (Day 1); 24, 48*, 72, 96*, 168, 240*, and<br>336 h (Days 2, 3*, 4, 5*, 8, 11*, and 15)<br><br><u>Cycle 2 &amp; subsequent cycles:</u> pre-dose, 10 min, 2 and<br>4 h post EOI (Day 1); 24, 72, 168, and 336 h (Days 2,<br>4, 8, and 15)<br><br><u>Post-treatment:</u> EOT and 28 days post EOT<br><br>*Only patients enrolled in expansion cohorts                     |
| Study 2<br>Phase 1 dose-ranging<br>study<br>[NCT00649584]  | 0.4 to 1.4 mg/kg IV weekly<br>(Days 1, 8, and 15 of each<br>28-day cycle): 2-hr or<br>30-min infusion <sup>c</sup> | Relapsed/refractory<br>CD30-expressing<br>hematologic<br>malignancies     | 46 <sup>b</sup>                 | <u>Cycle 1:</u> pre-dose, 10 min, 2 and 4 h post EOI (Day 1);<br>24 and 72 h (Days 2 and 4); pre-dose and 10 min post<br>EOI (Days 8 and 15); and 168 h after Day 15 dose<br>(Day 22)<br><br><u>Cycle 2 &amp; subsequent cycles:</u> pre-dose and 10 min<br>post EOI (Days 1, 8, and 15); 2 and 4 h post EOI (Day<br>15); 24, 72, and 168 h after Day 15 dose (Days 16, 18,<br>and 22)<br><br><u>Post-treatment:</u> EOT and 28 days post EOT |
| Study 3<br>Phase 2 pivotal study<br>in HL<br>[NCT00848926] | 1.8 mg/kg IV Q3Wk (Day 1<br>of each 21-day cycle):<br>30-min infusion                                              | Relapsed/refractory<br>HL; previous<br>autologous stem<br>cell transplant | 102                             | <u>Cycles 1 and 2:</u> pre-dose and 10 min post EOI<br>(Day 1); 24 and 336 h after dose (Days 2 and 15)<br><br><u>Cycle 3 &amp; subsequent cycles:</u> pre-dose and 10 min<br>post EOI (Day 1)<br><br><u>Post-treatment:</u> EOT                                                                                                                                                                                                              |

| Study Description<br>[clinicaltrials.gov no.]                                                                       | Brentuximab Vedotin<br>Dose Regimen                                                                                                                     | Patient Population                                                    | No. of<br>Patients <sup>a</sup> | Brentuximab Vedotin<br>PK Sampling Timepoints                                                                                                                                                                                                                                                                                                                                                                                                                                                     |
|---------------------------------------------------------------------------------------------------------------------|---------------------------------------------------------------------------------------------------------------------------------------------------------|-----------------------------------------------------------------------|---------------------------------|---------------------------------------------------------------------------------------------------------------------------------------------------------------------------------------------------------------------------------------------------------------------------------------------------------------------------------------------------------------------------------------------------------------------------------------------------------------------------------------------------|
| Study 4<br>Phase 2 pivotal study<br>in sALCL<br>[NCT00866047]                                                       | 1.8 mg/kg IV Q3Wk (Day 1<br>of each 21-day cycle):<br>30-min infusion                                                                                   | Relapsed/refractory<br>sALCL; previous<br>front-line<br>chemotherapy  | 58                              | <u>Cycles 1 and 2:</u> pre-dose and 10 min post EOI<br>(Day 1); 24 and 336 h after dose (Days 2 and 15)<br><br><u>Cycle 3 &amp; subsequent cycles:</u> pre-dose and 10 min<br>post EOI (Day 1)<br><br><u>Post-treatment:</u> EOT                                                                                                                                                                                                                                                                  |
| Study 5 (Part A)<br>Phase 1 clinical<br>pharmacology study:<br>drug-drug interactions <sup>e</sup><br>[NCT01026415] | 1.2 mg/kg* or 1.8 mg/kg**<br>IV Q3Wk (Day 1 of each<br>21-day cycle): 30-min<br>infusion<br><br>* ketoconazole arm<br>** midazolam and rifampin<br>arms | Relapsed/refractory<br>CD30-expressing<br>hematologic<br>malignancies | 56 <sup>d</sup>                 | <u>Ketoconazole arm – Cycle 1:</u> pre-dose and EOI post<br>BV; 2, 4, 8, and 12 h after dose (Day 1); 24 and 36 h<br>(Day 2); 48, 72, 96, 168, 240, 336, and 408 h (Days 3,<br>4, 5, 8, 11, 15, and 18)<br><br><u>Midazolam arm – Cycle 1:</u> pre-dose and EOI post BV<br>(Day 1); 48 h after dose (Day 3)<br><br><u>Rifampin arm – Cycle 1:</u> pre-dose and EOI post BV; 2,<br>4, 8, and 12 h after dose (Day 1); 24 and 36 h (Day 2);<br>48, 72, 96, 168, and 240 h (Days 3, 4, 5, 8, and 11) |
| Study 5 (Part B)<br>Phase 1 clinical<br>pharmacology study:<br>hepatic and renal<br>impairment<br>[NCT01026415]     | 1.2 mg/kg IV Q3Wk (Day 1<br>of each 21-day cycle):<br>30-min infusion                                                                                   | Relapsed/refractory<br>CD30-expressing<br>hematologic<br>malignancies | 4 <sup>d</sup>                  | <u>Cycle 1:</u> pre-dose, EOI post BV, 2, 4, 8, and 12 h after<br>dose (Day 1); 24 and 36 h (Day 2); 48, 72, 96, and<br>168 h (Days 3, 4, 5, and 8); and 240, 336, 408, and<br>504 h (Days 11, 15, 18, and 22 <sup>f</sup> )<br><br><u>Cycle 2:</u> pre-dose                                                                                                                                                                                                                                      |

BV, brentuximab vedotin; EOI, end of infusion; EOT, end of treatment visit; HL, Hodgkin lymphoma; IV, intravenously; Q3Wk, every 3 weeks; sALCL, systemic anaplastic large cell lymphoma.

- a Number of patients contributing to the population PK analyses.
- b Includes 5 patients who were re-enrolled with new patient numbers and retreated in Study 1 (n=3) or in Study 2 (n=2).
- c Protocol amended to reduce infusion time.
- d Study 5 included a total of 60 patients (56 patients from the drug-drug interaction portion of the study and 4 patients with renal impairment).
- e For Study 5, concentration data that could have been affected by potential drug-drug interactions were excluded from the PopPK analysis.
- f Day 22 of Cycle 1 only for patients who did not continue to Cycle 2.

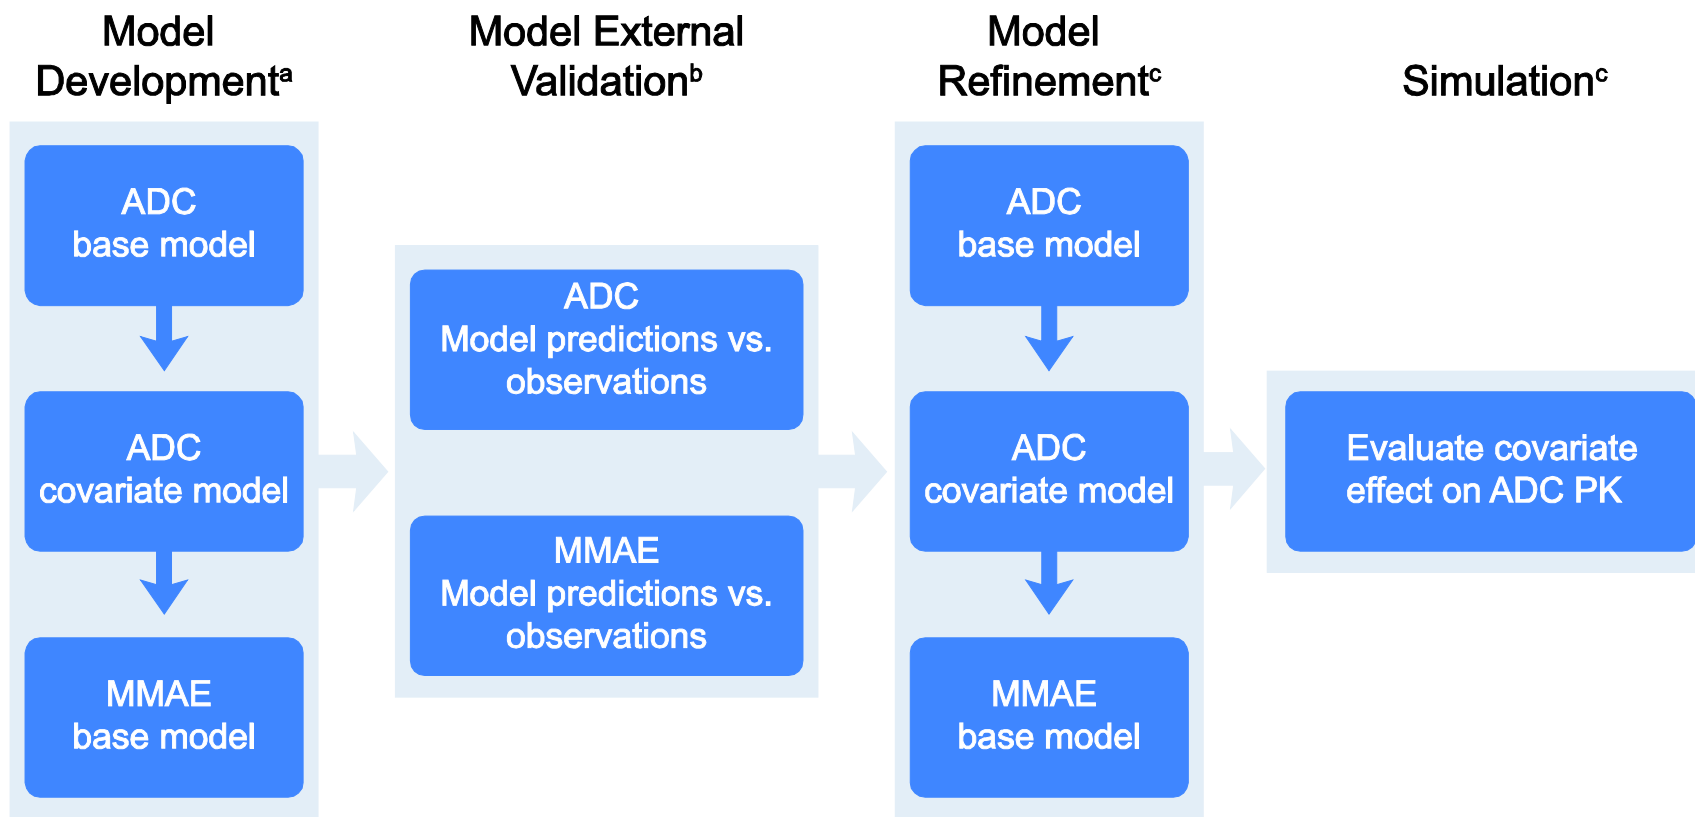

<sup>a</sup> Dataset for model building: Studies 1 and 2 (N=94 patients; 3677 ADC and 3796 MMAE concentrations)

<sup>b</sup> Dataset for model external validation: Studies 3, 4, and 5 (N=220 patients; 3404 ADC and 3656 MMAE concentrations)

<sup>c</sup> Dataset for model refinement and simulation: All five studies (N=314 patients; 7081 ADC and 7452 MMAE concentrations)

**Supplementary Figure S1. Sequential Population PK Model Development**

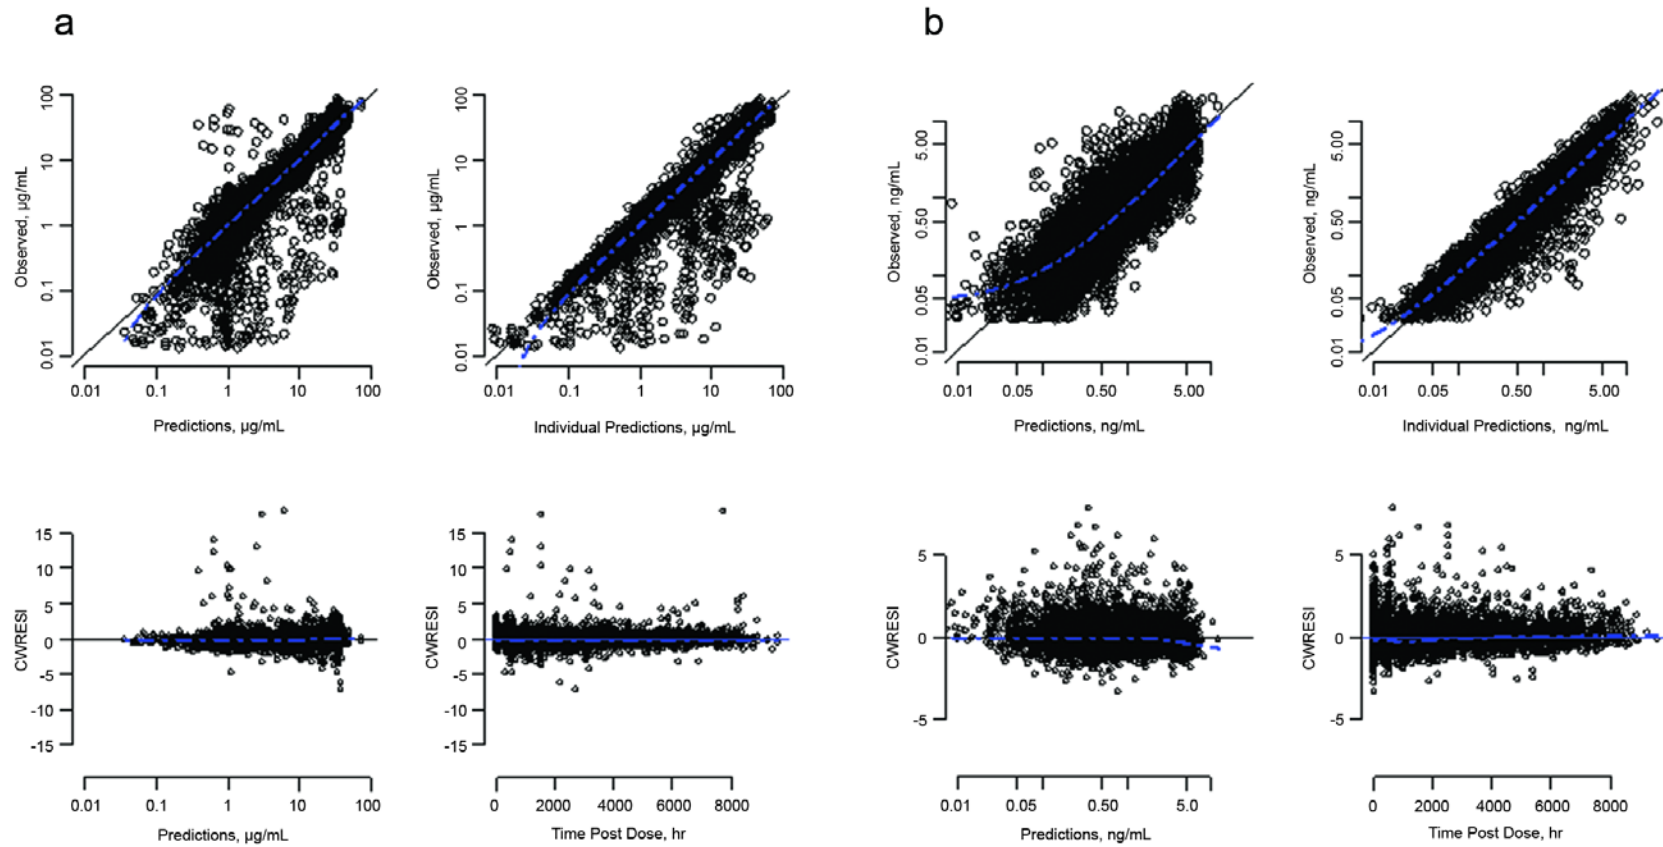

### Supplementary Figure S2. Goodness-of-Fit Plots

Model predicted ADC (a) and MMAE (b) concentrations (population prediction and individual prediction) vs. observed concentrations for brentuximab vedotin administered IV at 1.8 mg/kg Q3Wk (Study 3); and conditionally weighted residuals with  $\eta$ - $\epsilon$  interaction (CWRESI) versus model predicted values and time postdose.

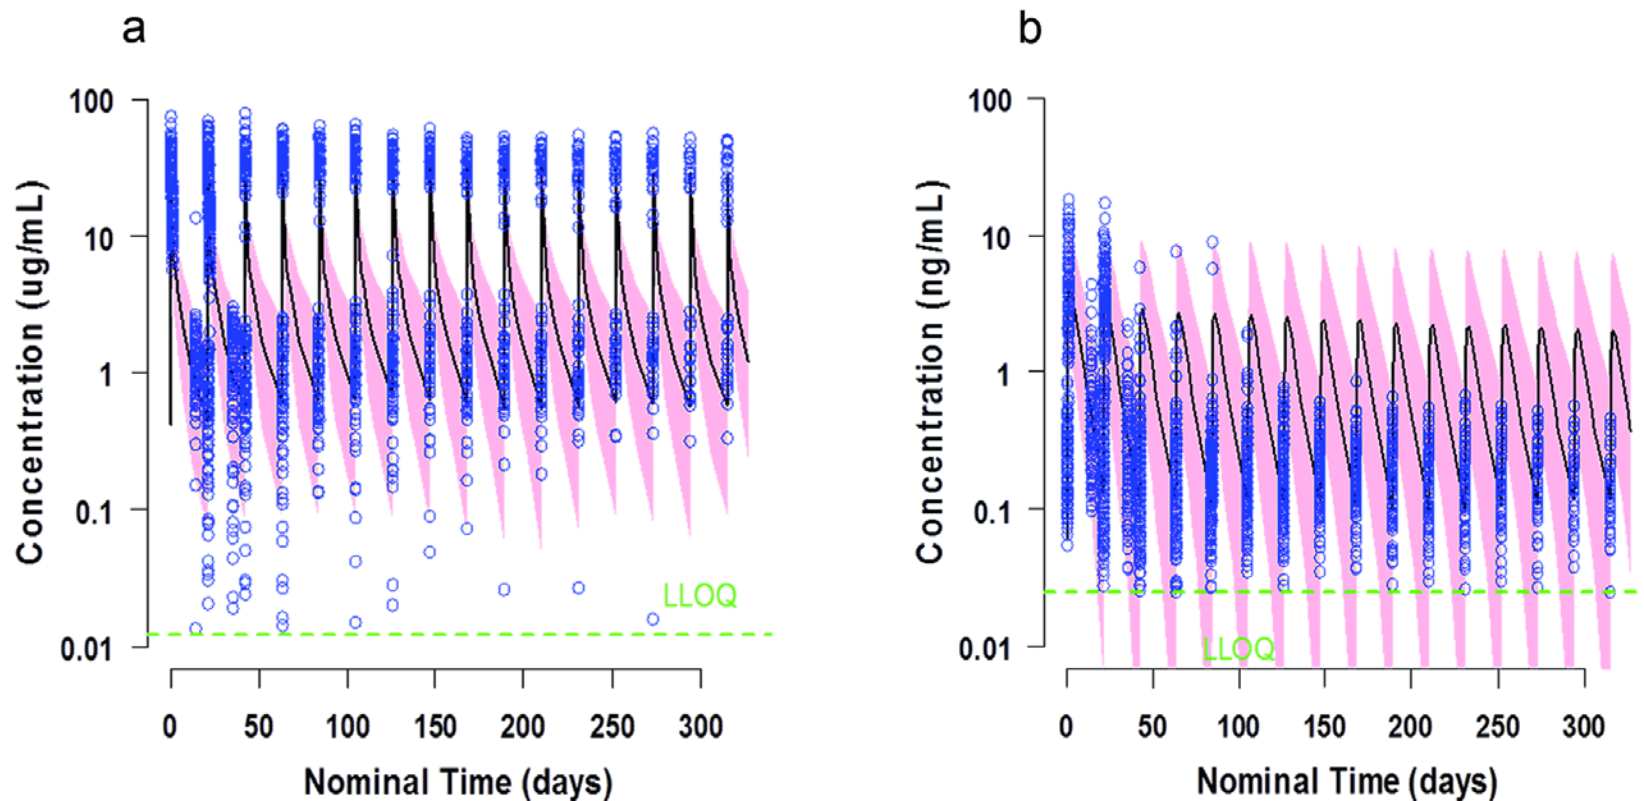

### Supplementary Figure S3. Model External Validation

Model predicted ADC (a) and MMAE (b) concentrations vs. observed concentrations for brentuximab vedotin administered IV at 1.8 mg/kg Q3Wk (Study 3). Pink shaded area, 90% prediction interval; blue circles, observed data; green dotted line, lower limit of assay quantification (LLOQ).

**Supplementary Material S1. NONMEM Code for the ADC and MMAE Population PK Model**

$K10=CL/V1$   
 $K12=Q2/V1$   
 $K21=Q2/V2$   
 $K13=Q3/V1$   
 $K31=Q3/V3$   
 $K40=CLM/V4$   
 $K45=Q5/V4$   
 $K54=Q5/V5$

FMC = CYCLE\*\*FM ; FRACTION OF ADC CONVERTS TO MMAE BY CYCLE

\$DES

DAR=DAR0\*(ALPHA + (1-ALPHA)\*EXP(-BETA\*(T-DTIME))) ;

DADT(1) = - (K10 + K12 + K13)\*A(1) + K21\*A(2)+ K31\*A(3) ; ADC CENTRAL COMPT

DADT(2) = K12\*A(1) - K21\*A(2) ; ADC PERI COMPT -1

DADT(3) = K13\*A(1) - K31\*A(3) ; ADC PERI COMPT -2

DADT(4) = K10\*A(1)\*DAR\*FMC + A(1)\*(DAR-DAR0\*ALPHA)\*BETA-K40\*A(4)-K45\*A(4) + K54\*A(5) ; MMAE CENTRAL COMPT

DADT(5) = K45\*A(4) - K54\*A(5) ;MMAE PERI COMPT

; Proteolytic pathway

DADT(6) = K10\*A(1)\*DAR

; deconjugation pathway

DADT(7) = A(1)\*(DAR-DAR0\*ALPHA)\*BETA

\$ERROR

; % contribution from deconjugation pathway

DECON= A(7) / (A(6) + A(7)) \*100

**Supplementary Appendix S1. Clinical Study Sites and Institutional Review Boards**

| <b>Principal Investigator</b> | <b>Study<sup>a</sup></b> | <b>Clinical Study Site</b>                                                                   | <b>Institutional Review Board</b>                                                                                 |
|-------------------------------|--------------------------|----------------------------------------------------------------------------------------------|-------------------------------------------------------------------------------------------------------------------|
| Advani, Ranjana               | 2 and 3                  | Stanford University Medical Center, Stanford, CA, US                                         | Research Compliance Office, Stanford Administrative Panel on Human Subjects in Medical Research, Stanford, CA, US |
| Ansell, Stephen               | 3 and 4                  | Mayo Clinic, Rochester, MN, US                                                               | Mayo Clinic Institutional Review Board, Rochester, MN, US                                                         |
| Baccarani, Michele            | 3                        | Istituto di Ematologia ed Oncologia Medica, Bologna, Italy                                   | Policlinico S. Orsola-Malpighi, Bologna, Italy                                                                    |
| Bartlett, Nancy               | 1, 2, 3, and 4           | Washington University School of Medicine, St. Louis, MO, US                                  | Washington University School of Medicine, Human Research Protection Office, St. Louis, MO                         |
| Berryman, Robert Brian        | 3 and 4                  | Baylor University Medical Center, Dallas, TX, US                                             | Baylor Research Institute, Dallas, TX, US                                                                         |
| Blum, Kristie                 | 3                        | James Cancer Hospital / Ohio State University, Columbus, OH, US                              | Western Institutional Review Board, Olympia, WA, US                                                               |
| Bouabdallah, Reda             | 3 and 4                  | Institut Paoli Calmettes, Marseille, France                                                  | CPP Île de France 3, Paris, France                                                                                |
| Brice, Pauline                | 3 and 4                  | Service des Maladies du Sang / Hospital Saint Louis, Paris, France                           | CPP Île de France 3, Paris, France                                                                                |
| Chen, Andy                    | 4                        | Oregon Health and Science University / Center for Hematologic Malignancies, Portland, OR, US | Oregon Health & Science University Research Integrity Office, Portland, OR, US                                    |
| Chen, Robert                  | 3 and 5                  | City of Hope National Medical Center, Duarte, CA, US                                         | City of Hope National Medical Center Institutional Review Board, Duarte, CA, US                                   |
| Cheson, Bruce                 | 3                        | Lombardi Cancer Center / Georgetown University Medical Center, Washington DC, US             | MedStar Health Research Institute – Georgetown University Oncology Institutional Review Board, Washington DC, US  |
| Cooper, Maureen               | 5                        | St. Francis Medical Group Oncology & Hematology Specialists, Indianapolis, IN, US            | St. Francis Hospital and Health Center Institutional Review Board, Beech Grove, IN, US                            |
| Crump, Michael                | 3 and 4                  | University Health Network, Princess Margaret Hospital, Toronto, Ontario, Canada              | University Health Network Research Ethics Board, Toronto, Ontario, Canada                                         |
| de Vos, Sven                  | 3                        | UCLA Medical Center / University of California at Los Angeles, Los Angeles, CA, US           | UCLA Office for the Protection of Research Subjects, Los Angeles, CA, US                                          |



| <b>Principal Investigator</b> | <b>Study<sup>a</sup></b> | <b>Clinical Study Site</b>                                                                 | <b>Institutional Review Board</b>                                                                                                   |
|-------------------------------|--------------------------|--------------------------------------------------------------------------------------------|-------------------------------------------------------------------------------------------------------------------------------------|
| Elstrom, Rebecca              | 3 and 4                  | Weill Cornell Medical College, New York, NY, US                                            | Institutional Review Board (Weill Cornell Medical College), New York, NY, US                                                        |
| Evens, Andrew                 | 4                        | Northwestern University, Chicago, IL, US                                                   | Northwestern University Medical School - Office for the Protection of Research Subjects Institutional Review Board, Chicago, IL, US |
| Fanale, Michelle              | 2 and 4                  | MD Anderson Cancer Center / University of Texas, Houston, TX, US                           | The University of Texas, MD Anderson Cancer Center, Office of Protocol Research Houston, TX, US                                     |
| Forero-Torres, Andres         | 1, 2, 3, and 4           | University of Alabama at Birmingham, Birmingham, AL, US                                    | Western Institutional Review Board, Olympia, WA, US                                                                                 |
| Friedberg, Jonathan           | 3                        | University of Rochester Medical Center, Rochester, NY, US                                  | Western Institutional Review Board, Olympia, WA, US                                                                                 |
| Gopal, Ajay                   | 3 and 5                  | Seattle Cancer Care Alliance / University of Washington Medical Center, Seattle, WA, US    | Western Institutional Review Board, Olympia, WA, US                                                                                 |
| Goy, Andre                    | 5                        | Hackensack University Medical Center, Hackensack, NJ, US                                   | Western Institutional Review Board, Olympia, WA, US                                                                                 |
| Illidge, Tim                  | 4                        | Christie Hospital NHS Foundation Trust, Manchester, United Kingdom                         | Central Manchester Research Ethics Committee, Manchester, United Kingdom                                                            |
| Leonard, John                 | 1                        | Weill Cornell Medical College of Cornell University, New York, NY, US                      | Institutional Review Board (Weill Cornell Medical College), New York, NY, US                                                        |
| Link, Michael                 | 4                        | Stanford Cancer Center, Palo Alto, CA, US                                                  | Research Compliance Office, Palo Alto, CA, US                                                                                       |
| Matous, Jeffrey               | 5                        | Rocky Mountain Cancer Centers, Denver, CO, US                                              | HCA-HealthONE Institutional Review Board, Glendale, CO, US                                                                          |
| Matous, Jeffrey               | 4                        | HCA HealthOne-Rocky Mountain Blood & Marrow Transplant Program, Denver, CO, US             | Western Institutional Review Board, Olympia, WA, US                                                                                 |
| Maziarz, Richard              | 3                        | Center for Hematologic Malignancies / Oregon Health & Science University, Portland, OR, US | Oregon Health & Science University Research Integrity Office, Portland, OR, US                                                      |
| Moskowitz, Craig              | 3                        | Memorial Sloan Kettering Cancer Center, New York, NY, US                                   | Institutional Review Board-Memorial Sloan Kettering Cancer Center, New York, NY, US                                                 |
| O'Connor, Owen                | 5                        | New York University Cancer Institute, New York, NY, US                                     | New York University Medical Center Institutional Review Board                                                                       |
| Oshefski, Randal Scott        | 4                        | Nationwide Children's Hospital, Columbus, OH, US                                           | Nationwide Children's Hospital Institutional Review Board, Columbus, OH, US                                                         |

| <b>Principal Investigator</b> | <b>Study<sup>a</sup></b> | <b>Clinical Study Site</b>                                                              | <b>Institutional Review Board</b>                                                                                                   |
|-------------------------------|--------------------------|-----------------------------------------------------------------------------------------|-------------------------------------------------------------------------------------------------------------------------------------|
| Pro, Barbara                  | 4                        | MD Anderson Cancer Center / University of Texas, Houston, TX, US                        | The University of Texas, MD Anderson Cancer Center, Office of Protocol Research Houston, TX, US                                     |
| Ramchandren, Radhakrishnan    | 3, 4, and 5              | Karmanos Cancer Institute / Wayne State, University, Detroit, MI, US                    | Wayne State University Human Investigation Committee, Detroit, MI, US                                                               |
| Rosenblatt, Joseph            | 3 and 4                  | University of Miami Hospital and Clinics, Miller School of Medicine, Miami, FL,, US     | University of Miami Human Subjects Research Office, Miami, FL, US                                                                   |
| Rosenblatt, Joseph            | 2                        | University of Miami Sylvester Comprehensive Cancer Center, Miami, FL, US                | Western Institutional Review Board, Olympia, WA, US                                                                                 |
| Savage, Kerry                 | 3 and 4                  | British Columbia Cancer Agency - Vancouver Centre, Vancouver, BC, Canada                | UBC BCCA Research Ethics Board, Vancouver, BC, Canada                                                                               |
| Shustov, Andrei               | 4                        | Seattle Cancer Care Alliance / University of Washington Medical Center, Seattle, WA, US | Western Institutional Review Board, Olympia, WA, US                                                                                 |
| Smith, Scott                  | 3                        | Cardinal Bernardin Cancer Center / Loyola University Medical Center, Maywood, IL, US    | Loyola University Medical Center Institutional Review Board - Office of Research, Maywood, IL, US                                   |
| Sweetenham, John              | 3                        | The Cleveland Clinic, Cleveland, OH, US                                                 | Case Cancer Institutional Review Board, Cleveland, OH, US                                                                           |
| Termuhlen, Amanda             | 4                        | Nationwide Children's Hospital, Columbus, OH, US                                        | Nationwide Children's Hospital Institutional Review Board, Columbus, OH, US                                                         |
| Tilly, Herve                  | 3 and 4                  | Centre Henri Becquerel / Centre Regional de Lutte Contre le Cancer, Rouen, France       | CPP Île de France 3, Paris, France                                                                                                  |
| Trippett, Tanya               | 4                        | Memorial Sloan Kettering Cancer Center, New York, NY, US                                | Institutional Review Board-Memorial Sloan Kettering Cancer Center, New York, NY, US                                                 |
| Verhoef, Gregor               | 4                        | UZ Leuven, Leuven, Belgium                                                              | Commissie Medische Ethiek, Leuven, Belgium                                                                                          |
| Winter, Jane                  | 4                        | Northwestern University, Chicago, IL, US                                                | Northwestern University Medical School - Office for the Protection of Research Subjects Institutional Review Board, Chicago, IL, US |
| Younes, Anas                  | 1 and 3                  | MD Anderson Cancer Center / University of Texas, Houston, TX, US                        | The University of Texas, MD Anderson Cancer Center, Office of Protocol Research Houston, TX, US                                     |

a Data were collected from November 2006 – July 2009 (Study 1), March 2008 – February 2010 (Study 2), February 2009 – August 2010 (Study 3), June 2009 – June 2011 (Study 4), and December 2009 – June 2010 (Study 5, Part A; Part B was ongoing at the time of the data extract).
